# Supplementary material
Source: MDPI journal article supplement (https://www.mdpi.com/2071-1050/16/3/1137)
Supplement: s1 [file s1]

Article

# Chlorine Gas Removal by H<sub>2</sub> Treated Red Mud for the Potential Application in Waste Plastic Pyrolysis Process

Tae-Young Kim <sup>1,†</sup>, Seo-Hye Hong <sup>2,†</sup>, Jae-Chang Kim <sup>2</sup>, Hye-Won Jang <sup>2</sup>, Yeji Lee <sup>1</sup>, Hyun-Ji Kim <sup>3</sup>, Soo-Chool Lee <sup>1,\*</sup> and Suk-Hwan Kang <sup>3,\*</sup>

<sup>1</sup> Research Institute of Advanced Energy Technology, Kyungpook National University, Daegu 41566, Republic of Korea

<sup>2</sup> Department of Chemical Engineering, Kyungpook National University, Daegu 41566, Republic of Korea

<sup>3</sup> Institute for Advanced Engineering, Yongin 41718, Republic of Korea

\* Correspondence: soochool@knu.ac.kr (S.-C.L.); shkang@iae.re.kr (S.-H.K.)

† These authors contributed equally to this work.

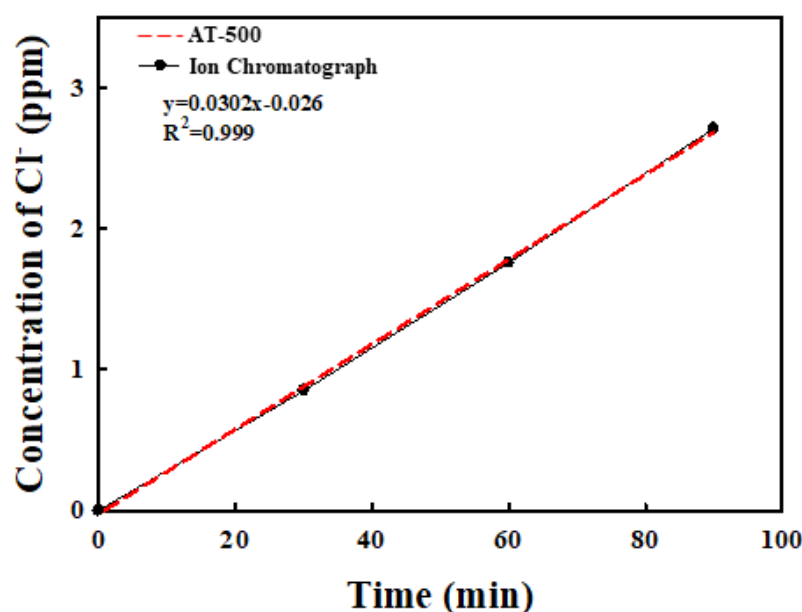

**Figure S1.** Calibration curve for Cl<sub>2</sub> between the Ion Chromatograph analysis and the real-time measurement

**Table S1.** Chemical Compositions of the red mud, as analyzed by XRF

| Sapmle | Fe (%) | Ti (%) | Na (%) | Ca (%) | Si (%) | Al (%) |
|--------|--------|--------|--------|--------|--------|--------|
| RM     | 73.75  | 10.14  | 5.63   | 3.74   | 3.57   | 3.17   |
